# Supplementary material for: Ancestral gene synteny reconstruction improves extant species scaffolding
Source: PubMed Central journal article supplement (PMC4603332; doi:10.1186/1471-2164-16-s10-s11), 2015-10-02
Supplement: 1471-2164-16-S10-S11-S1.pdf [file 1471-2164-16-S10-S11-S1.pdf]

1.  $E(v_1) = \text{Extant}$  and  $E(v_2) = \text{Extant}$ :

$$c_1(v_1, v_2) = -\log_b(P(v_1 \sim v_2))$$

$$c_0(v_1, v_2) = -\log_b(1 - P(v_1 \sim v_2))$$

2.  $E(v_1) = \text{GLoss}$  and  $E(v_2) \in \{\text{Extant}, \text{Spec}, \text{GDup}\}$ :

$$c_1(v_1, v_2) = c_0(v_1, v_2) = 0$$

3.  $E(v_1) \in \{\text{Extant}, \text{Spec}, \text{GDup}\}$  and  $E(v_2) = \text{GLoss}$ :

$$c_1(v_1, v_2) = c_0(v_1, v_2) = 0$$

4.  $E(v_1) = \text{GLoss}$  and  $E(v_2) = \text{GLoss}$ :

$$c_1(v_1, v_2) = c_0(v_1, v_2) = 0$$

5.  $E(v_1) \in \{\text{Extant}, \text{Spec}\}$  and  $E(v_2) = \text{GDup}$ :

$$c_1(v_1, v_2) = \min \begin{cases} c_1(v_1, b_{v_2}) + c_0(v_1, a_{v_2}), & c_0(v_1, b_{v_2}) + c_1(v_1, a_{v_2}), \\ c_1(v_1, b_{v_2}) + c_1(v_1, a_{v_2}) + \text{Gain}, & c_0(v_1, b_{v_2}) + c_0(v_1, a_{v_2}) + \text{Br} \end{cases}$$

$$c_0(v_1, v_2) = \min \begin{cases} c_0(v_1, b_{v_2}) + c_0(v_1, a_{v_2}), & c_0(v_1, b_{v_2}) + c_1(v_1, a_{v_2}) + \text{Gain}, \\ c_1(v_1, b_{v_2}) + c_0(v_1, a_{v_2}) + \text{Gain}, & c_1(v_1, b_{v_2}) + c_1(v_1, a_{v_2}) + 2\text{Gain} \end{cases}$$

6.  $E(v_1) = \text{GDup}$  and  $E(v_2) \in \{\text{Extant}, \text{Spec}\}$ :

$$c_1(v_1, v_2) = \min \begin{cases} c_1(a_{v_1}, v_2) + c_0(b_{v_1}, v_2), & c_0(a_{v_1}, v_2) + c_1(b_{v_1}, v_2), \\ c_1(a_{v_1}, v_2) + c_1(b_{v_1}, v_2) + \text{Gain}, & c_0(a_{v_1}, v_2) + c_0(b_{v_1}, v_2) + \text{Br} \end{cases}$$

$$c_0(v_1, v_2) = \min \begin{cases} c_0(a_{v_1}, v_2) + c_0(b_{v_1}, v_2), & c_0(a_{v_1}, v_2) + c_1(b_{v_1}, v_2) + \text{Gain}, \\ c_1(a_{v_1}, v_2) + c_0(b_{v_1}, v_2) + \text{Gain}, & c_1(a_{v_1}, v_2) + c_1(b_{v_1}, v_2) + 2\text{Gain}, \end{cases}$$

7.  $E(v_1) = \text{Spec}$  and  $E(v_2) = \text{Spec}$ :

$$c_1(v_1, v_2) = \min \begin{cases} c_1(a_{v_1}, b_{v_2}) + c_1(b_{v_1}, a_{v_2}), & c_1(a_{v_1}, b_{v_2}) + c_0(b_{v_1}, a_{v_2}) + \text{Br}, \\ c_0(a_{v_1}, b_{v_2}) + c_1(b_{v_1}, a_{v_2}) + \text{Br}, & c_0(a_{v_1}, b_{v_2}) + c_0(b_{v_1}, a_{v_2}) + 2\text{Br}, \\ c_1(a_{v_1}, a_{v_2}) + c_1(b_{v_1}, b_{v_2}), & c_1(a_{v_1}, a_{v_2}) + c_0(b_{v_1}, b_{v_2}) + \text{Br}, \\ c_0(a_{v_1}, a_{v_2}) + c_1(b_{v_1}, b_{v_2}) + \text{Br}, & c_0(a_{v_1}, a_{v_2}) + c_0(b_{v_1}, b_{v_2}) + 2\text{Br} \end{cases}$$

$$c_0(v_1, v_2) = \min \begin{cases} c_0(a_{v_1}, b_{v_2}) + c_0(b_{v_1}, a_{v_2}), & c_1(a_{v_1}, b_{v_2}) + c_0(b_{v_1}, a_{v_2}) + \text{Gain}, \\ c_0(a_{v_1}, b_{v_2}) + c_1(b_{v_1}, a_{v_2}) + \text{Gain}, & c_1(a_{v_1}, b_{v_2}) + c_1(b_{v_1}, a_{v_2}) + 2\text{Gain}, \\ c_0(a_{v_1}, a_{v_2}) + c_0(b_{v_1}, b_{v_2}), & c_1(a_{v_1}, a_{v_2}) + c_0(b_{v_1}, b_{v_2}) + \text{Gain}, \\ c_0(a_{v_1}, a_{v_2}) + c_1(b_{v_1}, b_{v_2}) + \text{Gain}, & c_1(a_{v_1}, a_{v_2}) + c_1(b_{v_1}, b_{v_2}) + 2\text{Gain}, \end{cases}$$

8.  $E(v_1) = \text{GDup}$  and  $E(v_2) = \text{GDup}$ :

$$c_1(v_1, v_2) = \min \begin{cases} c_1(a_{v_1}, v_2) + c_0(b_{v_1}, v_2), & c_0(a_{v_1}, v_2) + c_1(b_{v_1}, v_2), \\ c_1(a_{v_1}, v_2) + c_1(b_{v_1}, v_2) + \text{Gain}, & c_0(a_{v_1}, v_2) + c_0(b_{v_1}, v_2) + \text{Br}, \\ c_1(v_1, a_{v_2}) + c_0(v_1, b_{v_2}), & c_0(v_1, a_{v_2}) + c_1(v_1, b_{v_2}), \\ c_1(v_1, a_{v_2}) + c_1(v_1, b_{v_2}) + \text{Gain}, & c_0(v_1, a_{v_2}) + c_0(v_1, b_{v_2}) + \text{Br}, \\ c_1(a_{v_1}, a_{v_2}) + c_1(b_{v_1}, b_{v_2}) + c_0(a_{v_1}, b_{v_2}) + c_0(b_{v_1}, a_{v_2}), & \\ c_1(a_{v_1}, a_{v_2}) + c_1(b_{v_1}, b_{v_2}) + c_0(a_{v_1}, b_{v_2}) + c_1(b_{v_1}, a_{v_2}) + \text{Gain}, & \\ c_1(a_{v_1}, a_{v_2}) + c_1(b_{v_1}, b_{v_2}) + c_1(a_{v_1}, b_{v_2}) + c_0(b_{v_1}, a_{v_2}) + \text{Gain}, & \\ c_1(a_{v_1}, a_{v_2}) + c_1(b_{v_1}, b_{v_2}) + c_1(a_{v_1}, b_{v_2}) + c_1(b_{v_1}, a_{v_2}) + 2\text{Gain}, & \\ c_1(a_{v_1}, a_{v_2}) + c_0(b_{v_1}, b_{v_2}) + c_0(a_{v_1}, b_{v_2}) + c_0(b_{v_1}, a_{v_2}) + \text{Br}, & \\ c_1(a_{v_1}, a_{v_2}) + c_0(b_{v_1}, b_{v_2}) + c_0(a_{v_1}, b_{v_2}) + c_1(b_{v_1}, a_{v_2}) + \text{Gain} + \text{Br}, & \\ c_1(a_{v_1}, a_{v_2}) + c_0(b_{v_1}, b_{v_2}) + c_1(a_{v_1}, b_{v_2}) + c_0(b_{v_1}, a_{v_2}) + \text{Gain} + \text{Br}, & \\ c_0(a_{v_1}, a_{v_2}) + c_1(b_{v_1}, b_{v_2}) + c_0(a_{v_1}, b_{v_2}) + c_0(b_{v_1}, a_{v_2}) + \text{Br}, & \\ c_0(a_{v_1}, a_{v_2}) + c_1(b_{v_1}, b_{v_2}) + c_0(a_{v_1}, b_{v_2}) + c_1(b_{v_1}, a_{v_2}) + \text{Gain} + \text{Br}, & \\ c_0(a_{v_1}, a_{v_2}) + c_1(b_{v_1}, b_{v_2}) + c_1(a_{v_1}, b_{v_2}) + c_0(b_{v_1}, a_{v_2}) + \text{Gain} + \text{Br}, & \\ c_0(a_{v_1}, a_{v_2}) + c_0(b_{v_1}, b_{v_2}) + c_1(a_{v_1}, b_{v_2}) + c_1(b_{v_1}, a_{v_2}), & \\ c_0(a_{v_1}, a_{v_2}) + c_1(b_{v_1}, b_{v_2}) + c_1(a_{v_1}, b_{v_2}) + c_1(b_{v_1}, a_{v_2}) + \text{Gain}, & \\ c_1(a_{v_1}, a_{v_2}) + c_0(b_{v_1}, b_{v_2}) + c_1(a_{v_1}, b_{v_2}) + c_1(b_{v_1}, a_{v_2}) + \text{Gain}, & \\ c_0(a_{v_1}, a_{v_2}) + c_0(b_{v_1}, b_{v_2}) + c_1(a_{v_1}, b_{v_2}) + c_0(b_{v_1}, a_{v_2}) + \text{Br}, & \\ c_0(a_{v_1}, a_{v_2}) + c_0(b_{v_1}, b_{v_2}) + c_0(a_{v_1}, b_{v_2}) + c_1(b_{v_1}, a_{v_2}) + \text{Br}, & \\ c_0(a_{v_1}, a_{v_2}) + c_0(b_{v_1}, b_{v_2}) + c_0(a_{v_1}, b_{v_2}) + c_0(b_{v_1}, a_{v_2}) + 2\text{Br}, & \end{cases}$$

$$c_0(v_1, v_2) = \min \begin{cases} c_0(a_{v_1}, v_2) + c_0(b_{v_1}, v_2), & c_0(a_{v_1}, v_2) + c_1(b_{v_1}, v_2) + \text{Gain}, \\ c_1(a_{v_1}, v_2) + c_0(b_{v_1}, v_2) + \text{Gain}, & c_1(a_{v_1}, v_2) + c_1(b_{v_1}, v_2) + 2\text{Gain}, \\ c_0(v_1, a_{v_2}) + c_0(v_1, b_{v_2}), & c_0(v_1, a_{v_2}) + c_1(v_1, b_{v_2}) + \text{Gain}, \\ c_1(v_1, a_{v_2}) + c_0(v_1, b_{v_2}) + \text{Gain}, & c_1(v_1, a_{v_2}) + c_1(v_1, b_{v_2}) + 2\text{Gain}. \end{cases}$$
