# Supplementary material for: Ancestral gene synteny reconstruction improves extant species scaffolding
Source: PubMed Central journal article supplement (PMC4603332; doi:10.1186/1471-2164-16-s10-s11), 2015-10-02

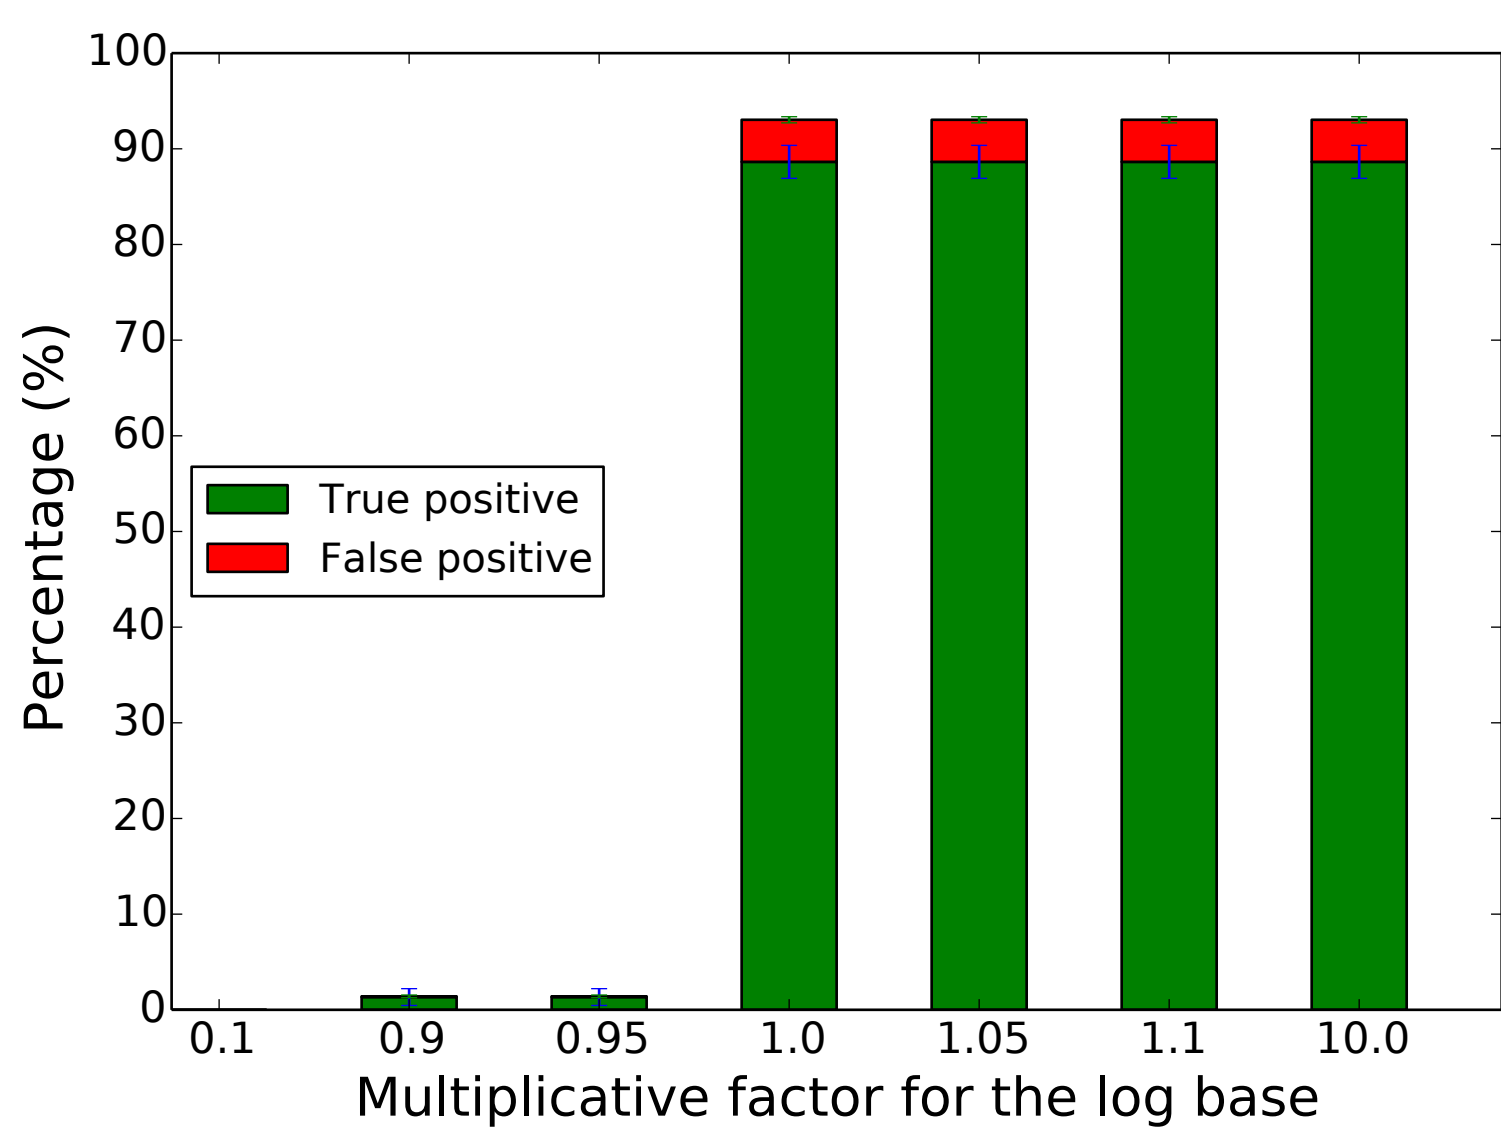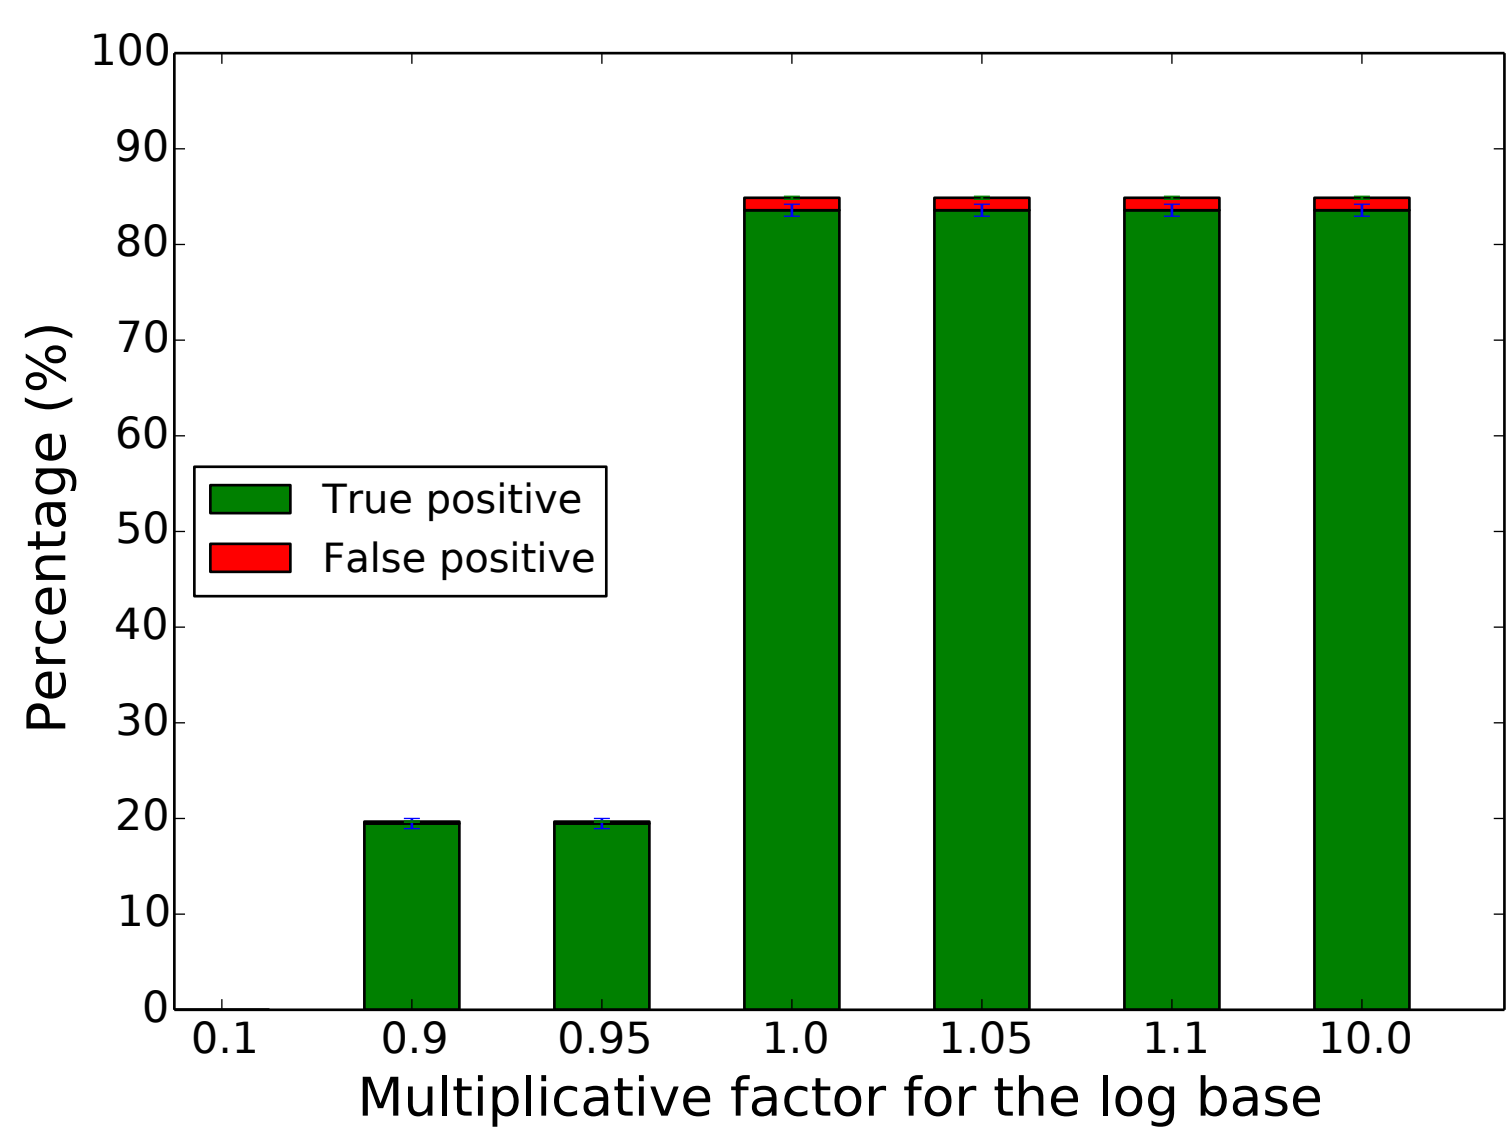

Supplement: 1471-2164-16-S10-S11-S2.pdf [file 1471-2164-16-S10-S11-S2.pdf]
